# Supplementary material for: Sup35p in Its Soluble and Prion States Is Packaged inside Extracellular Vesicles
Source: PubMed Central journal article supplement — mBio. 2015 Aug 18;6(4):e01017-15. doi: 10.1128/mBio.01017-15 (PMC4542192; doi:10.1128/mbio.01017-15), 2015-08-18
Supplement: mbo004152436sf1.pdf [file mbo004152436sf1.pdf]

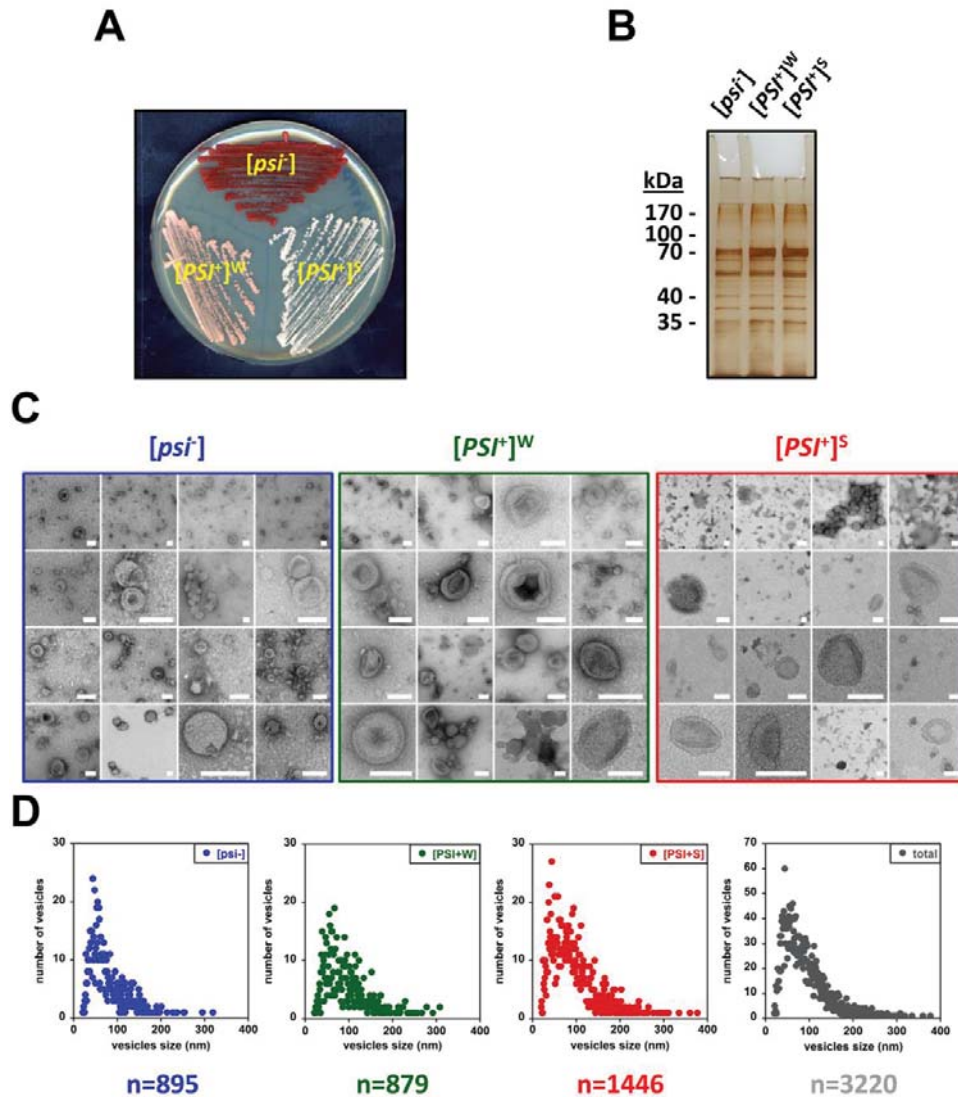

**Figure S1. Characterization of EV purified from  $[psi^-]$ ,  $[PSI^+]^S$  and  $[PSI^+]^W$  yeast cultures.** (A) Prion phenotypes of the strains used in this study were assessed on 1/4-YPD plates. (B) Purified EV from the indicated strains were analyzed by SDS-PAGE and silver staining. (C) Negative-stained electron micrographs of purified EV (scale bars: 100 nm). (D) The size distribution of the indicated EV preparations was determined by analyzing electron micrographs such as those shown in (C) using the ImageJ software. The number (n) of vesicles measured in each analysis is indicated (three independent EV preparations were analyzed and combined for each strain). Results from all EV preparations were combined to generate the ‘total’ graph.
