# Supplementary material for: Sup35p in Its Soluble and Prion States Is Packaged inside Extracellular Vesicles
Source: PubMed Central journal article supplement — mBio. 2015 Aug 18;6(4):e01017-15. doi: 10.1128/mBio.01017-15 (PMC4542192; doi:10.1128/mbio.01017-15), 2015-08-18
Supplement: mbo004152436sf2.pdf [file mbo004152436sf2.pdf]

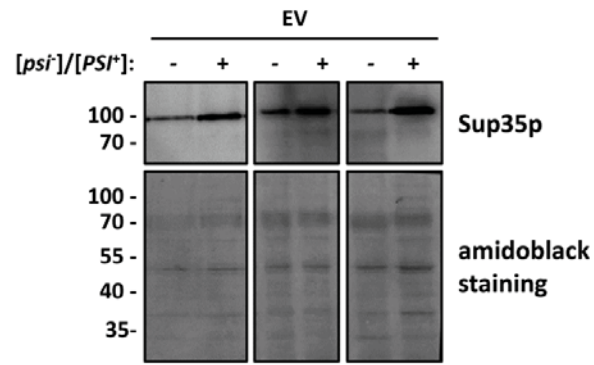

**Figure S2. Slight variations in the levels of Sup35p are observed among different EV preparations.** Purified EV (~3 μg) from [*psi*<sup>-</sup>] or [*PSI*<sup>+</sup>]<sup>S</sup> strains were analyzed by SDS-PAGE and western blot using anti-Sup35p antibodies (upper panel). The membrane was stained with amidoblack (lower panel) to reveal total EV proteins.
