# Supplementary material for: Sup35p in Its Soluble and Prion States Is Packaged inside Extracellular Vesicles
Source: PubMed Central journal article supplement — mBio. 2015 Aug 18;6(4):e01017-15. doi: 10.1128/mBio.01017-15 (PMC4542192; doi:10.1128/mbio.01017-15), 2015-08-18
Supplement: mbo004152436sf3.pdf [file mbo004152436sf3.pdf]

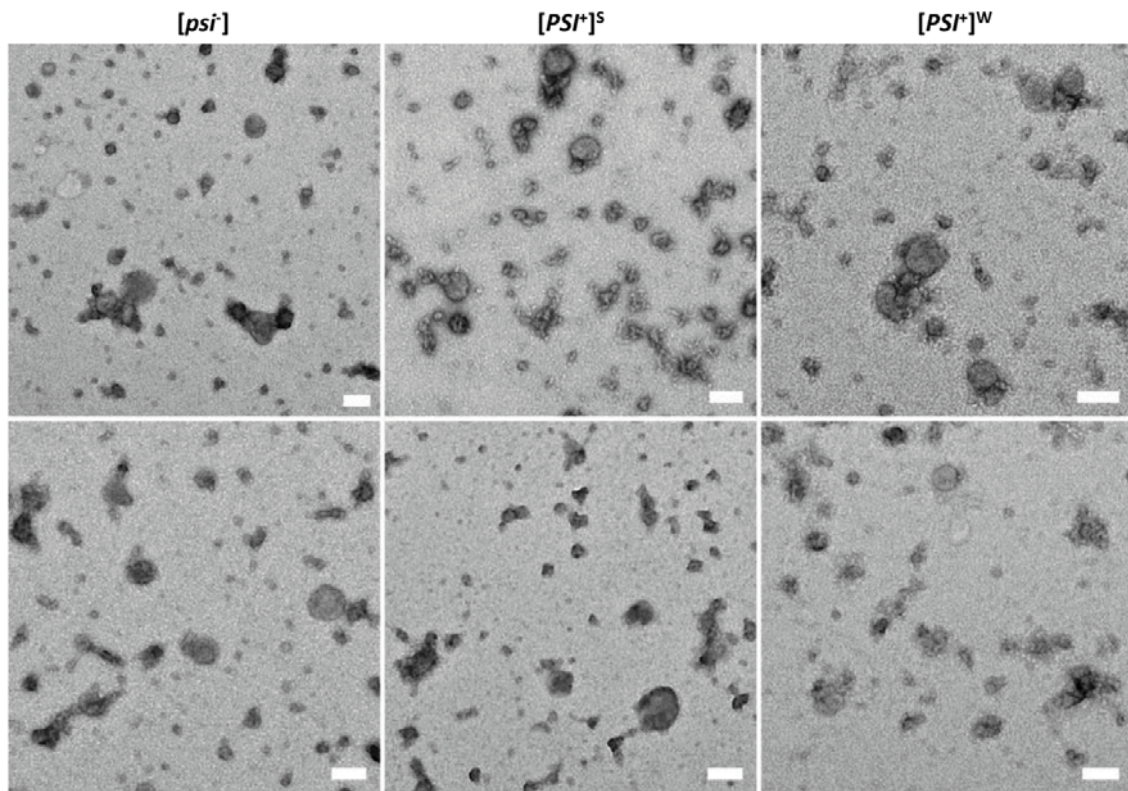

**Figure S3. EV are not stained by gold-conjugated secondary antibodies in the absence of primary anti-Sup35p antibody.** EV were fixed with 2% paraformaldehyde, adsorbed onto electron microscopy grids and permeabilized with 0.02% Triton X-100 for 10 min. Electron microscopy grids were incubated with anti-rabbit gold-conjugated antibodies, fixed with 1% glutaraldehyde and then visualized by negative-stain electron microscopy (scale bars: 100 nm).
