# Supplementary material for: Sup35p in Its Soluble and Prion States Is Packaged inside Extracellular Vesicles
Source: PubMed Central journal article supplement — mBio. 2015 Aug 18;6(4):e01017-15. doi: 10.1128/mBio.01017-15 (PMC4542192; doi:10.1128/mbio.01017-15), 2015-08-18
Supplement: mbo004152436sf4.pdf [file mbo004152436sf4.pdf]

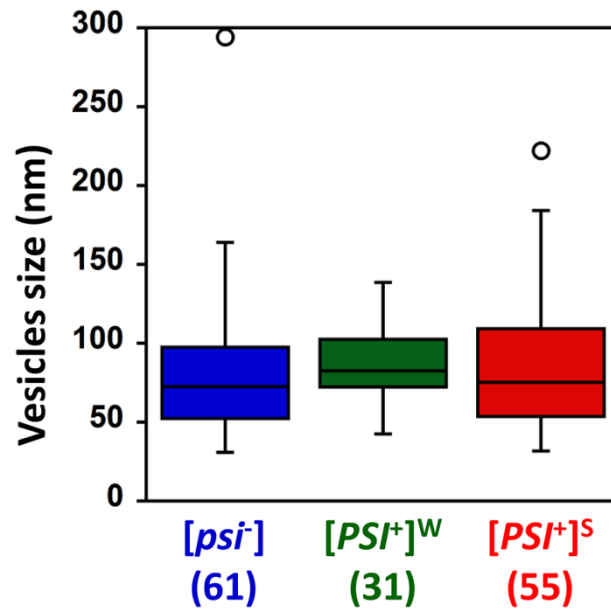

**Figure S4. Size distribution of immunogold-labeled Sup35p-positive vesicles.** Immunogold labeling of Sup35p and negative-stain electron microscopy of EV isolated from the indicated strains was performed as described in Fig. 1B. The size distribution of immunogold-labeled Sup35p-positive vesicles was determined using the ImageJ software and represented as a boxplot showing median (middle line within each box), 25th (boxes lower boundaries) and 75th (boxes upper boundaries) percentile, minimal and maximal values (whiskers), and outliers (dots). The number of immunogold-labeled Sup35p-positive vesicles analyzed for each EV type is indicated at the bottom of the plot.
