# Supplementary material for: Sup35p in Its Soluble and Prion States Is Packaged inside Extracellular Vesicles
Source: PubMed Central journal article supplement — mBio. 2015 Aug 18;6(4):e01017-15. doi: 10.1128/mBio.01017-15 (PMC4542192; doi:10.1128/mbio.01017-15), 2015-08-18
Supplement: mbo004152436sf6.pdf [file mbo004152436sf6.pdf]

**A**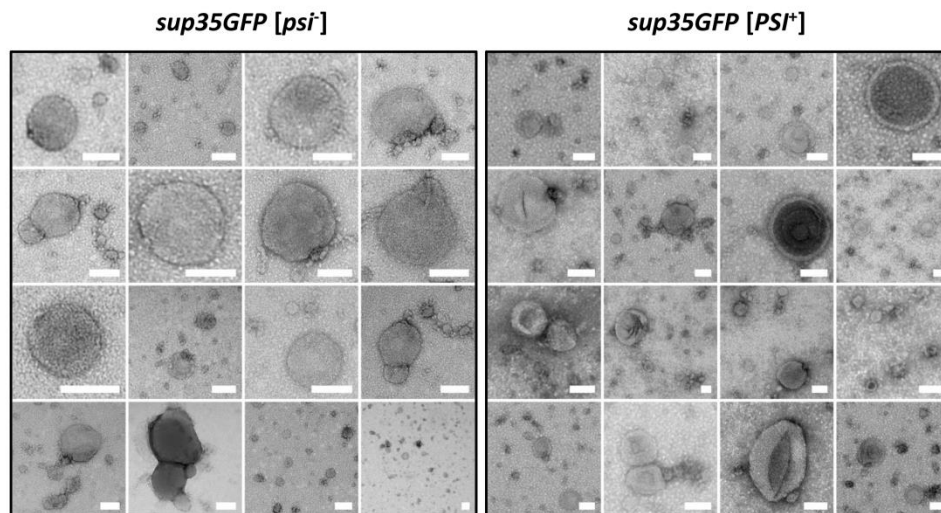**B**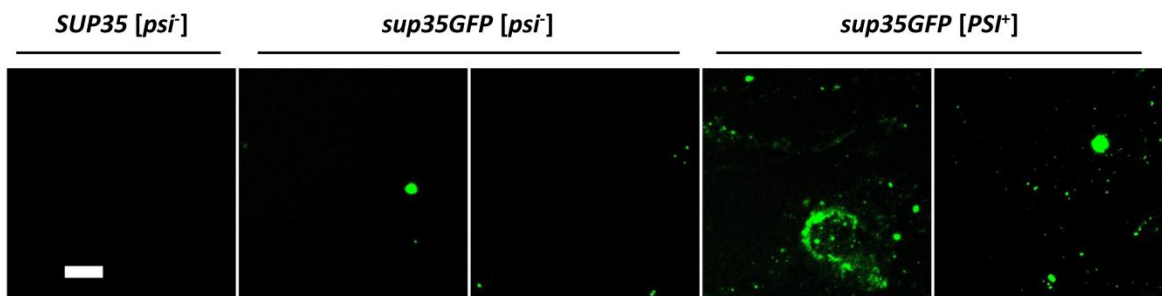

**Figure S6. EV isolated from a [PSI<sup>+</sup>] *sup35GFP* strain display a punctate fluorescence pattern.** (A) Negative-stained electron micrographs of EV preparations from the indicated strains (scale bars: 100 nm). (B) EV preparations from the indicated strains were directly observed under a fluorescence microscope (scale bar: 50  $\mu$ m).
