# Supplementary material for: Sup35p in Its Soluble and Prion States Is Packaged inside Extracellular Vesicles
Source: PubMed Central journal article supplement — mBio. 2015 Aug 18;6(4):e01017-15. doi: 10.1128/mBio.01017-15 (PMC4542192; doi:10.1128/mbio.01017-15), 2015-08-18
Supplement: mbo004152436sf7.pdf [file mbo004152436sf7.pdf]

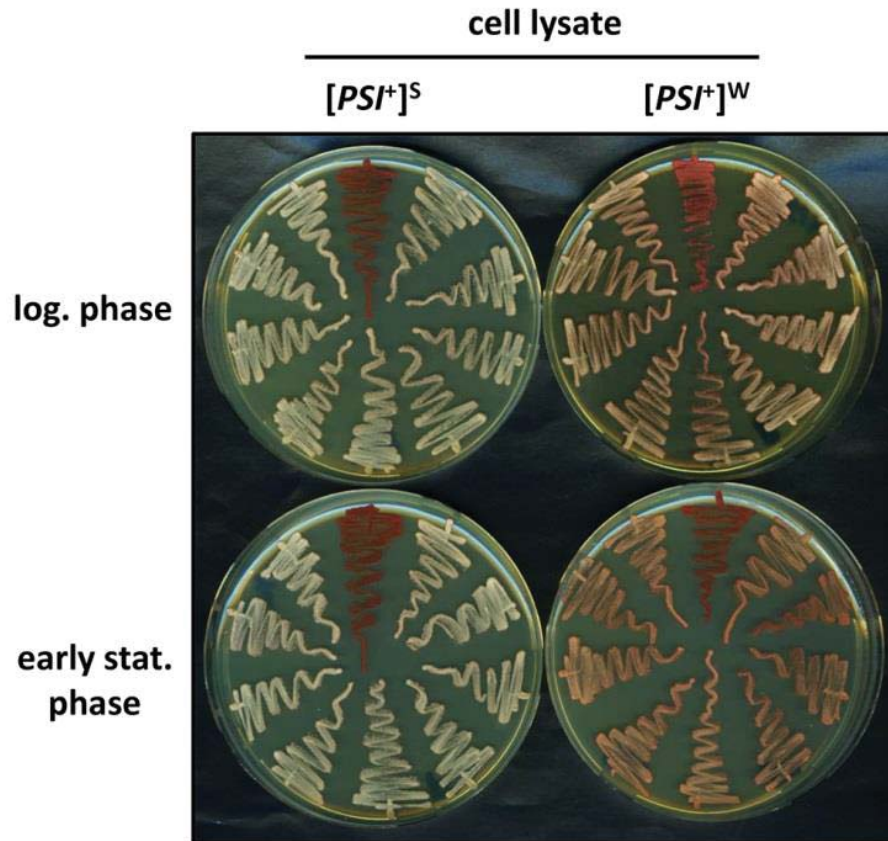

**Figure S7. Cell lysates from strong and weak  $[PSI^+]$  strains induce strong and weak  $[PSI^+]$  clones, respectively, in protein transformation assays.** Representative  $[psi^-]$  and  $[PSI^+]$  clones obtained by transforming  $[psi^-]$  spheroplasts with the indicated cell lysates (as in Fig. 2B) were streaked on  $1/4$ -YPD plates to assess their prion phenotype.
